# Supplementary material for: Na4SnS4 and Na4SnSe4 exhibiting multifunctional physicochemical performances as potential infrared nonlinear optical crystals and sodium ion conductors
Source: Royal Society of Chemistry journal article supplement (doi:10.1039/d1nj02565a), 2021-01-01
Supplement: d1nj02565a1.pdf [file d1nj02565a1.pdf]

**Na<sub>4</sub>SnS<sub>4</sub> and Na<sub>4</sub>SnSe<sub>4</sub> exhibiting multifunctional physicochemical performances  
as potential infrared nonlinear optical crystals and sodium ion conductors**

Lihua Gao, Gang Bian, Ya Yang, Bingbing Zhang, Xiaowen Wu,\* Kui Wu\*

College of Chemistry and Environmental Science, Hebei University, Baoding 071002,  
China

*To whom correspondence should be addressed :*

*E-mails: wukui@hbu.edu.cn (Kui Wu)*

**CONTENTS**

1. Synthesis of Title Compounds
2. Structural Refinement and Crystal Data
3. Property Characterization
4. Figures and Tables

## 1. Synthesis of Title Compounds

Initial reagents with high purity ( $\geq 99.9\%$ ) including  $\text{Na}_2\text{S}$ ,  $\text{Na}_2\text{Se}$ ,  $\text{SnS}_2$  and  $\text{SnSe}_2$ , were directly purchased from the Beijing Hawk Science & Technology Co., Ltd. Whole preparation process was completed in an Ar-filled glovebox because of the instability for  $\text{Na}_2\text{S}$  and  $\text{Na}_2\text{Se}$  in the air. Their reaction processes were achieved in the vacuum-sealed silica tubes by the high-temperature muffle furnace. Title compounds were successfully synthesized under the sinter temperature at  $500\text{ }^\circ\text{C}$  for several days and then cool to room temperature with the rate at  $5\text{ }^\circ\text{C/h}$ . Pale yellow crystals with high yield ( $>95\%$ ) in  $\text{Na}_4\text{SnS}_4$  were achieved. Deep-yellow crystals of  $\text{Na}_4\text{SnSe}_4$  were found in silica tubes. Among them,  $\text{Na}_4\text{SnSe}_4$  is hygroscopic and dissolve in water and  $\text{Na}_4\text{SnS}_4$  is relatively stable in the air.

## 2. Structural Refinement and Crystal Data

Selected high-quality crystals were used for data collections on a Bruker SMART APEX II 4K CCD diffractometer using Mo  $K\alpha$  radiation ( $\lambda = 0.71073\text{ \AA}$ ) at  $296\text{ K}$ . The crystal structures were solved by direct method and refined using the SHELXTL program package. Multi-scan method was used for absorption correction. Rational anisotropic thermal parameters for all atoms were obtained by the anisotropic refinement and extinction correction. PLATON was also used to check the final structures and no other symmetries were found. Detail refinement parameters and data were shown in Table S1.

## 3. Property Characterization

### 3.1 Powder X-ray Diffraction

Powder X-ray diffraction (XRD) patterns of title compounds were collected on a Bruker D2 X-ray diffractometer with Cu  $K\alpha$  radiation ( $\lambda = 1.5418\text{ \AA}$ ) at room temperature. The  $2\theta$  range was  $10\text{-}70^\circ$  with a step size of  $0.02^\circ$  and a fixed counting time of  $1\text{s/step}$ . In order to avoid the moisture absorption of micro-crystals, we have to test their powder XRD in the custom-made vacuum-sealed apparatus and the sample loading process was completed in the Ar-atmosphere glovebox.

### **3.2 UV–Vis–Near-IR (NIR) Diffuse-Reflectance Spectra**

Diffuse-reflectance spectra were measured by a Shimadzu SolidSpec-3700DUV spectrophotometer in the wavelength range of 200–1100 nm at room temperature. The sample-loading process was completed in the Ar-atmosphere glovebox and we used the highly transparent quartz plate on sealing the sample to keep the air out.

### **3.3 Raman spectra**

Hand-picked crystals were first put on an object slide, and then a LABRAM HR Evolution spectrometer equipped with a CCD detector by a 532 nm laser was used to record the Raman spectra. The integration time was set to be 5 s. In view of the extremely short test time (< 30 s) in whole testing process, this test does not need the vacuum protection.

### **3.4 Second-harmonic Generation Measurement**

Through the Kurtz and Perry method, powder SHG responses of title compounds were investigated by a Q-switch laser (2.09  $\mu\text{m}$ , 3 Hz, 50 ns) with different particle sizes, including 38–55, 55–88, 88–105, 105–150, 150–200, and 200–250  $\mu\text{m}$ . The AgGaS<sub>2</sub> crystal was ground and sieved into the same size range as the reference. The sample-loading process in sample-box was completed in the Ar-atmosphere glovebox and then the sample box was further sealed use the sealant.

### **3.5 LDT Measurement**

The LDTs of title compounds were evaluated on powder sample (150–200  $\mu\text{m}$ ) with a pulsed YAG laser. Similar size of AgGaS<sub>2</sub> is chosen as the reference. To adjust different laser beams, an optical concave lens is added into the laser path. The damage spot is measured by the scale of optical microscope. This vacuum protection process is similar to that of SHG measurement.

### **3.6 Conductivity Measurements**

The electrochemical impedance spectra (EIS) of title compounds have measured by an electrochemical workstation (Biologic, VSP) and the frequency ranged from 1MHz to 1Hz. All the tableting and drying processes are completed in the glovebox. Powder sample of three compounds were pelleted with a thickness of approximate 1mm and a diameter of 13mm under 20 ton of pressure. Then taking these pellets on one heating

plate about 3-5 h after covering silver paste in the glovebox. The pellets were plated into one special sealed box with electrode on both ends. The temperature-dependent AC impedance spectra for title compounds were studied at different temperature from 20 to 70 °C with an increment of 10 °C. The ionic conductivity was obtained through the equation  $\sigma=L/S \cdot R$ , where L is pelleted thickness, S is the area, and the total resistance R is equal to real impedance when imaginary impedance approaches zero ( $Z'' \approx 0$ ). After this test, the pellets show no sign of moisture absorption.

### **3.7 Computational Description**

Utilized the plane-wave pseudopotential method implemented in the CASTEP, the electronic structures of title compounds were performed on DFT. All of them were optimized by The Perdew-Burke-Ernzerhof (PBE) exchange-correlation of Generalized Gradient Approximation (GGA). A Kleinman-Bylander representation of the ultrasoft pseudopotential is automatically introduced and the valance electrons of the related atoms were: Na  $2s^2 3s^1$ , Sn  $5s^2 5p^2$ , S  $3s^2 3p^4$  and Se  $4s^2 4p^4$ , respectively. Also, kinetic energy cut-offs were set to be 600.0 eV with a density of fewer than  $0.05 \text{ \AA}^{-1}$  in the Brillouin zone (BZ) was adopted. As important parameters for NLO crystals, SHG coefficient and birefringence were also calculated with suitable scissors operators.

#### 4. Figures and Tables

**Table S1.** Crystal data and structure refinement for title compounds.

**Table S2.** Coordination environments of Na and Sn atoms in the Na-Sn-Se system.

**Table S3.** Comparison on LDTs between title compounds and AgGaS<sub>2</sub>.

**Table S4.** Ionic conductivities in title compounds at different temperatures.

**Figure S1.** Powder XRD patterns of title compounds.

**Figure S2.** Raman spectra of title compounds.

**Figure S3.** Calculated electronic structures of title compounds.

**Figure S4.** Powder SHG response *versus* particle size among title compounds and AgGaS<sub>2</sub> (as a reference).

**Figure S5.** SHG density at the occupied and unoccupied states in Na<sub>4</sub>SnSe<sub>4</sub>.

**Table S1.** Crystal data and structure refinement for title compounds.

| Empirical formula                                                                        | Na <sub>4</sub> SnS <sub>4</sub>                           | Na <sub>4</sub> SnSe <sub>4</sub>                          |
|------------------------------------------------------------------------------------------|------------------------------------------------------------|------------------------------------------------------------|
| formula weight                                                                           | 338.89                                                     | 526.49                                                     |
| crystal system                                                                           | Tetragonal                                                 | Tetragonal                                                 |
| space group                                                                              | <i>P</i> <sub>4</sub> <sup>-</sup> 2 <sub>1</sub> <i>c</i> | <i>P</i> <sub>4</sub> <sup>-</sup> 2 <sub>1</sub> <i>c</i> |
| cell parameter <i>a</i> (Å)                                                              | 7.8419(6)                                                  | 8.1674(7)                                                  |
| cell parameter <i>c</i> (Å)                                                              | 6.9522(9)                                                  | 7.2665(13)                                                 |
| <i>Z</i> , <i>V</i> (Å <sup>3</sup> )                                                    | 2, 427.53(9)                                               | 2, 484.72(12)                                              |
| <i>D</i> <sub>c</sub> (g/cm <sup>3</sup> )                                               | 2.633                                                      | 3.607                                                      |
| $\mu$ (mm <sup>-1</sup> )                                                                | 4.071                                                      | 17.748                                                     |
| goodness-of-fit on <i>F</i> <sup>2</sup>                                                 | 1.051                                                      | 0.933                                                      |
| <i>R</i> <sub>1</sub> , <i>wR</i> <sub>2</sub> ( <i>I</i> > 2σ( <i>I</i> )) <sup>a</sup> | 0.0117,0.0214                                              | 0.0202,0.0414                                              |
| <i>R</i> <sub>1</sub> , <i>wR</i> <sub>2</sub> (all data) <sup>a</sup>                   | 0.0127,0.0216                                              | 0.0225,0.0419                                              |
| absolute structure parameter                                                             | -0.01(3)                                                   | 0.034(18)                                                  |
| largest diff. peak and hole (e·Å <sup>-3</sup> )                                         | 0.194,-0.216                                               | 0.529,-0.392                                               |

<sup>a</sup> $R_1 = F_o - F_c / F_o$  and  $wR_2 = [w(F_o^2 - F_c^2)^2 / wF_o^4]^{1/2}$  for  $F_o^2 > 2\sigma(F_o^2)$

**Table S2.** Coordination environments of Na and Sn atoms in the Na-Sn-Se system.

| compounds                                       | Space group                                                | NaSe <sub><i>n</i></sub> | SnSe <sub><i>n</i></sub> and link modes             |
|-------------------------------------------------|------------------------------------------------------------|--------------------------|-----------------------------------------------------|
| Na <sub>6</sub> Sn <sub>2</sub> Se <sub>7</sub> | <i>C</i> 2/ <i>c</i>                                       | <i>n</i> = 4, 6          | 4, [Sn <sub>2</sub> Se <sub>7</sub> ] <sup>6-</sup> |
| Na <sub>2</sub> Sn <sub>2</sub> Se <sub>5</sub> | <i>Pbca</i>                                                | <i>n</i> = 6, 7          | 4, 2D layer                                         |
| α-Na <sub>2</sub> SnSe <sub>3</sub>             | <i>P</i> 2 <sub>1</sub> / <i>c</i>                         | <i>n</i> = 5, 6          | 4, (SnSe <sub>3</sub> ) <sub><i>n</i></sub> chain   |
| β-Na <sub>2</sub> SnSe <sub>3</sub>             | <i>Pnma</i>                                                | <i>n</i> = 5, 6          | 4, (SnSe <sub>3</sub> ) <sub><i>n</i></sub> chain   |
| Na <sub>4</sub> SnSe <sub>4</sub>               | <i>P</i> <sub>4</sub> <sup>-</sup> 2 <sub>1</sub> <i>c</i> | <i>n</i> = 5             | 4, [SnSe <sub>4</sub> ] <sup>4-</sup>               |

**Table S3.** Comparison on LDTs between title compounds and AgGaS<sub>2</sub>.

| compounds                         | damage energy (mJ) | spot diameter (mm) | LDT (MW/cm <sup>2</sup> ) | LDT (× AGS)* |
|-----------------------------------|--------------------|--------------------|---------------------------|--------------|
| AgGaS <sub>2</sub>                | 0.58               | 0.5                | 29.6                      | 1            |
| Na <sub>4</sub> SnS <sub>4</sub>  | 5.24               | 0.5                | 267                       | 9.0          |
| Na <sub>4</sub> SnSe <sub>4</sub> | 2.05               | 0.5                | 104                       | 3.5          |

\*AGS = AgGaS<sub>2</sub>

**Table S4.** Ionic conductivities in title compounds at different temperatures.

| Compounds         |                                   |                                  |
|-------------------|-----------------------------------|----------------------------------|
|                   | Na <sub>4</sub> SnSe <sub>4</sub> | Na <sub>4</sub> SnS <sub>4</sub> |
| $\sigma_T$ (S/cm) |                                   |                                  |
| 20 °C             | $1.132 \times 10^{-8}$            | $1.423 \times 10^{-8}$           |
| 30 °C             | $2.188 \times 10^{-8}$            | $2.176 \times 10^{-8}$           |
| 40 °C             | $3.431 \times 10^{-8}$            | $4.530 \times 10^{-8}$           |
| 50 °C             | $4.798 \times 10^{-8}$            | $8.710 \times 10^{-8}$           |
| 60 °C             | $6.291 \times 10^{-7}$            | $1.623 \times 10^{-7}$           |
| 70 °C             | $8.788 \times 10^{-7}$            | $5.631 \times 10^{-7}$           |

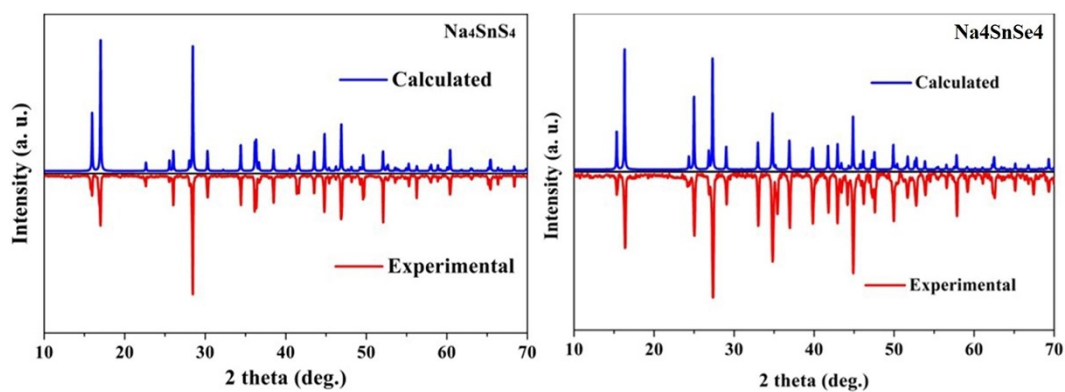

**Figure S1.** Powder XRD patterns of title compounds.

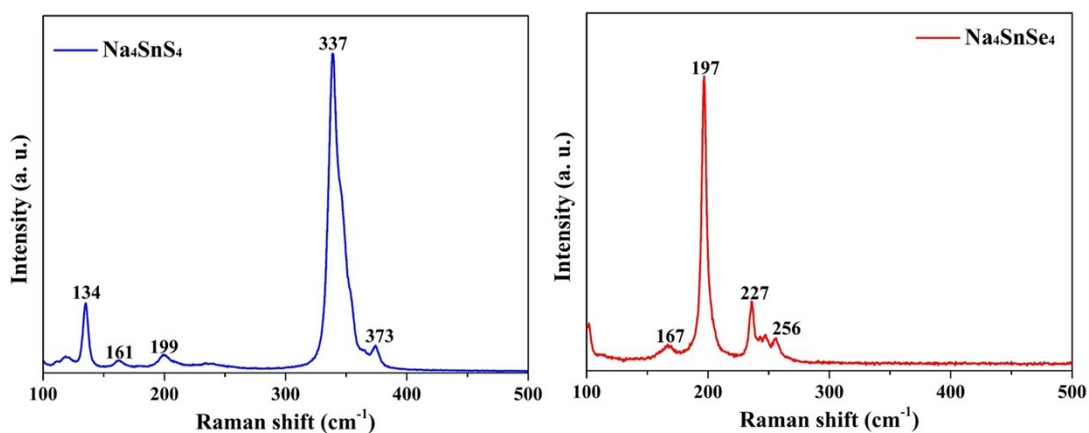

**Figure S2.** Raman spectra of title compounds.

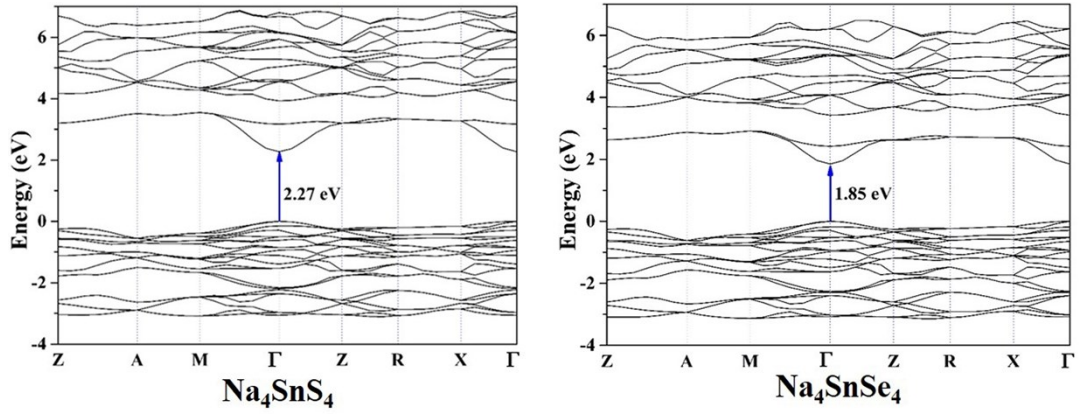

**Figure S3.** Calculated electronic structures of title compounds.

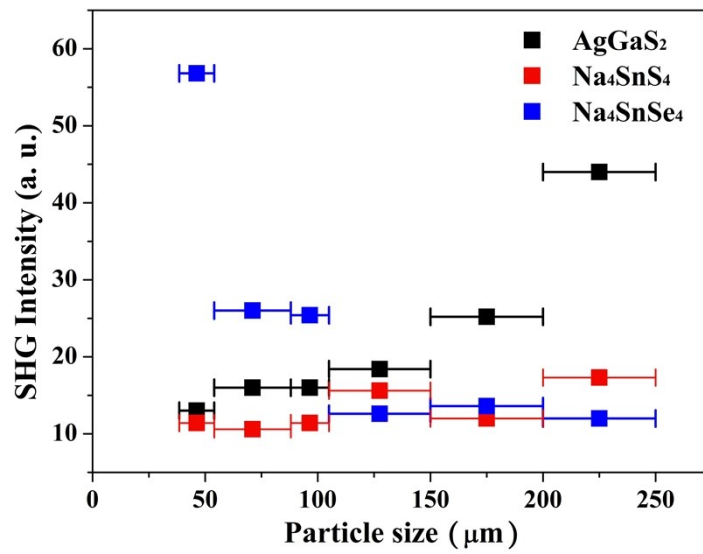

**Figure S4.** Powder SHG response *versus* particle size among title compounds and  $\text{AgGaS}_2$  (as a reference).

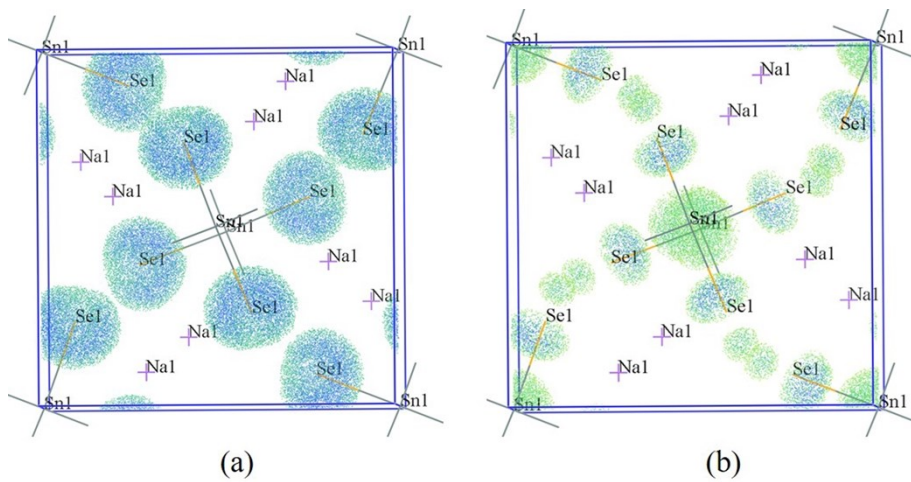

**Figure S5.** SHG density at the occupied (a) and unoccupied (b) states in  $\text{Na}_4\text{SnSe}_4$ .
